# Supplementary material for: Retinol dehydrogenase-10 promotes development and progression of human glioma via the TWEAK-NF-κB axis
Source: PubMed Central journal article supplement (PMC5739636; doi:10.18632/oncotarget.22166), 2017-10-27
Supplement: oncotarget-08-105262-s001.pdf [file oncotarget-08-105262-s001.pdf]

## Retinol dehydrogenase-10 promotes development and progression of human glioma via the TWEAK-NF- $\kappa$ B axis

### SUPPLYMENTARY MATERIALS

Supplementary Table 1: Expression of RDH10 in LGG and GBM samples in TCGA

|                  |     | Level of expression of the gene |                 | Total | P value |
|------------------|-----|---------------------------------|-----------------|-------|---------|
|                  |     | Low expression                  | High expression |       |         |
| RDH10 expression | LGG | 329                             | 186             | 515   | .000    |
|                  | GBM | 5                               | 147             | 152   |         |
| Total            |     | 334                             | 333             | 667   |         |

Supplementary Table 2: List of IKK $\alpha$  (NFKBIA) downstream genes expression changed in microarray

| Genes   | Entrez Gene Name                                                                        | FC (shRDH10/shCtrl) | Corrected P-Value |
|---------|-----------------------------------------------------------------------------------------|---------------------|-------------------|
| BIRC3   | baculoviral IAP repeat containing 3                                                     | 3.37                | 3.96E-04          |
| BCL2L1  | BCL2 like 1                                                                             | -1.66               | 1.76E-03          |
| BCL2L2  | BCL2 like 2                                                                             | -1.54               | 9.91E-05          |
| CDKN1A  | cyclin dependent kinase inhibitor 1A                                                    | 1.82                | 8.08E-05          |
| DDIT3   | DNA damage inducible transcript 3                                                       | 1.59                | 3.43E-04          |
| GADD45A | growth arrest and DNA damage inducible alpha                                            | 1.98                | 3.71E-05          |
| GADD45B | growth arrest and DNA damage inducible beta                                             | 1.93                | 6.99E-05          |
| MMP1    | matrix metalloproteinase 1                                                              | -2.25               | 9.28E-05          |
| MMP2    | matrix metalloproteinase 2                                                              | -2.20               | 5.82604E-05       |
| MMP3    | matrix metalloproteinase 3                                                              | -2.05               | 3.87E-05          |
| MMP7    | matrix metalloproteinase 7                                                              | -2.09               | 8.84E-04          |
| RAC1    | ras-related C3 botulinum toxin substrate 1 (rho family, small GTP binding protein Rac1) | -2.33               | 7.18E-05          |
| YAP1    | Yes associated protein 1                                                                | -1.59               | 2.23E-04          |

Supplementary Table 3: List of qPCR primers

| name                     | sequences                      |
|--------------------------|--------------------------------|
| <b>Primers for qPCR:</b> |                                |
| RDH10 sense:             | 5'- TGGGACATCAACACGCAAAGC-3'   |
| RDH10 antisense:         | 5'- TGCAAGTTACAGTGGGGCAGA-3'   |
| TNFRSF12A sense:         | 5'- CTCTGAGCCTGACCTTCGTG -3'   |
| TNFRSF12A antisense:     | 5'- TCTCCGCCGGTCTCCTCTAT -3'   |
| TRAF3 sense:             | 5'- GCGTGTCAAGAGAGCATCGTT-3'   |
| TRAF3 antisense:         | 5'- GCAGATGTCCCAGCATTA ACT-3'  |
| IKBKB sense              | 5'- GAACGGATGATGGCTCTG-3'      |
| IKBKB antisense          | 5'- CCCTTGCTTGCTCCTCTA-3'      |
| TGFBR1 sense             | 5'- ACGGCGTTACAGTGTTCCTG -3'   |
| TGFBR1 antisense         | 5'- GCACATACAAACGGCCTATCTC -3' |
| BMPR2 sense              | 5'- ACGGGTATCTTTTGTGGTGT-3'    |
| BMPR2 antisense          | 5'- TGTCAGCTTTCATAGTGGCATC-3'  |
| TRAF1 sense              | 5'- CATCTGTCGCTCTTCATCGT -3    |
| TRAF1 antisense          | 5'- AAGTGCTGGTCTCCACAATG -3    |
| MAP3K14 sense            | 5'- AAAATGGCCCGTGTGTGTG -3     |
| MAP3K14 antisense        | 5'- GCCGAGTGGAGACTCATCC -3     |
| NFKBIA sense             | 5'- CCTGAAGGCTACCAACTACA -3    |
| NFKBIA antisense         | 5'- ATCAGCACCCAAGGACAC -3      |
| NFKBIE sense             | 5'- TTACCCATGTTGGGTCAGCC -3    |
| NFKBIE antisense         | 5'- AACGGTGTTCAGGGTCCTC -3     |
| TNFAIP3 sense            | 5'- CCACGATGCTCAGGTTTG -3      |
| TNFAIP3 antisense        | 5'- TCCCTTTCTCAGCCAAGAC -3     |
| GADD45A sense            | 5'- GAGAGCAGAAGACCGAAAGG -3    |
| GADD45A antisense        | 5'- CAGCAGGCACAACACCAC -3      |
| CDKN1A sense             | 5'- TAGGCGGTTGAATGAGAGG -3     |
| CDKN1A antisense         | 5'- GTGACAGCGATGGGAAGG -3      |
| GAPDH sense              | 5'- TGA CTTCAACAGCGACACCCA -3  |
| GAPDH antisense          | 5'- CACCCTGTTGCTGTAGCCAAA -3   |
